# Supplementary material for: Pan-cancer Analysis of NEDD4L and Its Tumor Suppressor Effects in Clear Cell Renal Cell Carcinoma
Source: PubMed Central journal article supplement (PMC8425189; doi:10.7150/jca.58004), 2021-08-28
Supplement: jcav12p6242s1.pdf [file jcav12p6242s1.pdf]

**Table S1. Details of the infiltration value of interstitial cells and immune cells in tumor tissues**

| CancerType | Gene   | StromalScore (p-value) | ImmuneScore (p-value) |
|------------|--------|------------------------|-----------------------|
| KIRC       | NEDD4L | 6.48E-16               | 0                     |
| BLCA       | NEDD4L | 2.95E-14               | 1.50E-13              |
| PRAD       | NEDD4L | 3.27E-10               | 3.32E-17              |
| BRCA       | NEDD4L | 1.28E-08               | 0                     |
| LUAD       | NEDD4L | 1.37E-08               | 1.32E-12              |
| LUSC       | NEDD4L | 5.11E-08               | 1.47E-07              |
| UCEC       | NEDD4L | 1.69E-06               | 3.40E-07              |
| SARC       | NEDD4L | 7.79E-07               | 3.87E-06              |
| SKCM       | NEDD4L | 3.56E-16               | 1.83E-05              |
| THYM       | NEDD4L | 0.000126261            | 7.43E-08              |
| CESC       | NEDD4L | 0.000144075            | 6.53E-07              |
| LIHC       | NEDD4L | 8.66E-05               | 0.000421556           |
| STAD       | NEDD4L | 9.39E-07               | 0.000548171           |
| TGCT       | NEDD4L | 0.000743175            | 1.27E-11              |
| PAAD       | NEDD4L | 8.09E-07               | 0.000744245           |
| OV         | NEDD4L | 0.001010068            | 0.001837867           |
| LGG        | NEDD4L | 0.01235798             | 1.18E-10              |
| KIRP       | NEDD4L | 0.008044237            | 0.005736847           |
| LAML       | NEDD4L | 0.004831584            | 0.015044435           |
| HNSC       | NEDD4L | 0.000915919            | 0.022861088           |
| ESCA       | NEDD4L | 0.070551927            | 0.00109635            |
| PCPG       | NEDD4L | 0.018302933            | 0.082383888           |
| COAD       | NEDD4L | 0.031388438            | 0.076398502           |
| KICH       | NEDD4L | 0.078863218            | 0.039223729           |
| MESO       | NEDD4L | 0.128425162            | 0.021833888           |
| READ       | NEDD4L | 0.010343204            | 0.149422546           |
| CHOL       | NEDD4L | 0.036388982            | 0.124041244           |
| UCS        | NEDD4L | 0.182588143            | 0.171437062           |
| DLBC       | NEDD4L | 0.405426195            | 0.021214432           |
| ACC        | NEDD4L | 0.170649833            | 0.84407681            |

|      |        |             |             |
|------|--------|-------------|-------------|
| GBM  | NEDD4L | 0.912028877 | 0.251124592 |
| THCA | NEDD4L | 0.322032125 | 0.924467216 |
| UVM  | NEDD4L | 0.36603136  | 0.891325801 |
